# Supplementary material for: Spatiotemporal Changes in Mean and Extreme Climate: Farmers’ Perception and Its Agricultural Implications in Awash River Basin, Ethiopia
Source: MDPI journal article supplement (doi:10.3390/cli10060089), 2022-06-20
Supplement: s1 [file s1]

## Supplementary materials

**Table S1.** Sample Households per Agro-ecology Zone.

| <i>Woreda</i>      | <b>Kebeles<br/>(Villages)</b> | <b>Name of the<br/>AEZ_Class</b>                             | <b>Est Popn<br/>2019</b> | <b>Sample<br/>HHs</b> | <b>No of<br/>FGD</b> | <b>No of<br/>KII</b> |
|--------------------|-------------------------------|--------------------------------------------------------------|--------------------------|-----------------------|----------------------|----------------------|
| <b>Lode Hitosa</b> | Gebe                          | Cold to very cold humid sub_Afroalpine to Afroalpine [AEZ_1] | 1307                     | 101                   | 1                    | 3                    |
|                    | Tulu Jebi                     | Tepid to cool humid mid highlands [AEZ_2]                    | 1135                     | 88                    | 1                    |                      |
| <b>Merti</b>       | Gado Arba                     | Hot to warm moist lowlands [AEZ_3]                           | 1010                     | 78                    | 1                    | 3                    |
|                    | Wetro Dino                    | Hot to warm, arid lowland plains [AEZ_4]                     | 702                      | 54                    | 1                    |                      |
| <b>Adama</b>       | Segeqelo                      | Tepid to cool sub-moist mid-highlands [AEZ_5]                | 297                      | 23                    | 1                    | 3                    |
|                    | Gedemsa Kurfa                 | Hot to warm semi-arid lowlands [AEZ_6]                       | 496                      | 39                    | 1                    |                      |
| <b>Total</b>       | 6                             | 6                                                            | 4947                     | 384                   | 6                    | 9                    |

Cold to very cold humid [AEZ\_1], Tepid to cool humid [AEZ\_2], Hot to warm moist [AEZ\_3], Hot to warm arid [AEZ\_4], Tepid to cool sub moist [AEZ\_5], and Hot to warm semi-arid [AEZ\_6].

**Table S2.** Annual drought frequency over agro-ecologies for the period 1983–2016.

| <b>SPEI-12 Index Value<br/>and<br/>Description</b> | <b>Agro-Ecological Zones</b> |         |         |         |         |         |
|----------------------------------------------------|------------------------------|---------|---------|---------|---------|---------|
|                                                    | [AEZ_1]                      | [AEZ_2] | [AEZ_3] | [AEZ_4] | [AEZ_5] | [AEZ_6] |
| <b>+2.0 and above (Extremely wet)</b>              | 1                            | 2       | 0       | 0       | 1       | 1       |
| <b>+1.5 to +1.99 (Very wet)</b>                    | 3                            | 1       | 3       | 3       | 1       | 1       |
| <b>+1.0 to +1.49 (Moderately wet)</b>              | 0                            | 1       | 2       | 2       | 2       | 4       |
| <b>+0.5 to +0.99 (Mild wet)</b>                    | 3                            | 4       | 7       | 4       | 9       | 2       |
| <b>−0.49 to +0.49 (Normal condition)</b>           | 17                           | 17      | 11      | 14      | 10      | 18      |
| <b>−0.5 to −0.99 (Mild drought)</b>                | 5                            | 2       | 6       | 6       | 5       | 3       |
| <b>−1.0 to −1.49 (Moderate drought)</b>            | 2                            | 5       | 3       | 1       | 3       | 3       |
| <b>−1.5 to −1.99 (Severe drought)</b>              | 2                            | 1       | 2       | 4       | 3       | 2       |
| <b>−2.0 and below (Extreme drought)</b>            | 1                            | 1       | 0       | 0       | 0       | 0       |
| <b>Drought frequency</b>                           | 29.4%                        | 26.5%   | 32.4%   | 32.4%   | 32.4%   | 23.5%   |

Cold to very cold humid [AEZ\_1], Tepid to cool humid [AEZ\_2], Hot to warm moist [AEZ\_3], Hot to warm arid [AEZ\_4], Tepid to cool sub moist [AEZ\_5], and Hot to warm semi-arid [AEZ\_6].

**Table S3.** Agroecology based farmers' perception of trends of selected climate indices.

| <b>Perception</b>                               |          | <b>Major Agro-Ecology Zone</b> |       |       |       |       |       | <b>Total</b> |
|-------------------------------------------------|----------|--------------------------------|-------|-------|-------|-------|-------|--------------|
|                                                 |          | AEZ_1                          | AEZ_2 | AEZ_3 | AEZ_4 | AEZ_5 | AEZ_6 |              |
| <b>Perceived about Climate Change</b>           | No       | 9.3                            | 14.0  | 13.8  | 9.8   | 12.5  | 2.4   | 10.7         |
|                                                 | Yes      | 90.7                           | 86.0  | 86.2  | 90.2  | 87.5  | 97.6  | 89.3         |
| <b>Temperature over the years has increased</b> | Disagree | 18.7                           | 12.9  | 37.9  | 26.2  | 0     | 0     | 18.2         |
|                                                 | Agree    | 81.3                           | 87.1  | 62.1  | 73.8  | 100   | 100   | 81.8         |

|                                                                   |           |       |       |       |       |       |       |       |
|-------------------------------------------------------------------|-----------|-------|-------|-------|-------|-------|-------|-------|
| <b>Physical data (Tmin and Tmax)</b>                              | Decreased | 0     | 0     | 100   | 0     | 0     | 100   | 33.3  |
|                                                                   | Increased | 100   | 100   | 0     | 100   | 100   | 0     | 66.7  |
| <b>The number of Warm days (TX90P) over the years increased</b>   | Disagree  | 23.4  | 25.8  | 24.1  | 32.8  | 0     | 17.1  | 23.4  |
|                                                                   | Agree     | 76.6  | 74.2  | 75.9  | 67.2  | 100   | 82.9  | 76.6  |
| <b>Physical data (TX90P)</b>                                      | Decreased | 0     | 0     | 0     | 0     | 0     | 0     | 0     |
|                                                                   | Increased | 100   | 100   | 100   | 100   | 100   | 100   | 100   |
| <b>The number of cold nights (TN10p) over the years increased</b> | Disagree  | 70.1  | 68.8  | 46.6  | 70.5  | 91.7  | 29.3  | 36.7  |
|                                                                   | Agree     | 29.9  | 31.2  | 53.4  | 29.5  | 8.3   | 70.7  | 63.3  |
| <b>Physical data (TN10P)</b>                                      | Decreased | 100   | 100   | 100   | 100   | 0     | 0     | 66.7  |
|                                                                   | Increased | 0     | 0     | 0     | 0     | 100   | 100   | 33.3  |
| <b>The amount of rainfall (TRF) over a year has increased</b>     | Disagree  | 63.6  | 50.5  | 60.3  | 70.5  | 100   | 61    | 55.5  |
|                                                                   | Agree     | 36.4  | 49.5  | 39.7  | 29.5  | 0     | 39    | 44.5  |
| <b>Physical data (TRF)</b>                                        | Decreased | 100   | 100   | 100   | 100   | 100   | 0     | 80.3  |
|                                                                   | Increased | 0     | 0     | 0     | 0     | 0     | 100   | 16.7  |
| <b>Drought occurrence frequency increases</b>                     | Disagree  | 39.3  | 37.6  | 45.8  | 39.0  | 24.1  | 34.4  | 36.2  |
|                                                                   | Agree     | 60.7  | 62.4  | 54.2  | 61.0  | 75.9  | 65.6  | 63.8  |
| <b>Physical data (SPEI and SPI 12)</b>                            | Decreased | 0     | 0     | 0     | 0     | 0     | 0     | 0     |
|                                                                   | Increased | 100.0 | 100.0 | 100.0 | 100.0 | 100.0 | 100.0 | 100.0 |

Cold to very cold humid [AEZ\_1], Tepid to cool humid [AEZ\_2], Hot to warm moist [AEZ\_3], Hot to warm arid [AEZ\_4], Tepid to cool sub moist [AEZ\_5], and Hot to warm semi-arid [AEZ\_6]. Responses are in percentage.
